# Supplementary material
Source: Springer Nature journal article supplement (https://www.springermedizin.de/resource/supplementary/40478_2013_59_MOESM20_ESM.pdf/25658004)
Supplement: MOESM20 [file 25658004]

**TABLE 1: CISs in MBs and Cerebellum Controls**

**A. Medulloblastomas**

| Gene           | Chr | CIS Width | N  | I  | GKC p-value | Other Genes                | Inferred MOA | CGC | MB-Mut | MB-CIS |
|----------------|-----|-----------|----|----|-------------|----------------------------|--------------|-----|--------|--------|
| <i>Nfia</i>    | 4   | 28.6      | 20 | 27 | <1E-14      | -                          | Loss         | -   | -      | Ptch   |
| <i>Atxn2</i>   | 5   | 25        | 6  | 6  | <1E-14      | -                          | ?            | -   | -      | -      |
| <i>Tead1</i>   | 7   | 19.1      | 6  | 7  | 3.9E-14     | -                          | Gain         | -   | -      | Ptch   |
| <i>Tgif2</i>   | 2   | 0.8       | 3  | 4  | 0.0006      | -                          | Gain         | -   | -      | -      |
| <i>Crebbp</i>  | 16  | 37.1      | 5  | 5  | 0.0009      | -                          | Loss         | S   | Y      | Ptch   |
| <i>Dscr3</i>   | 16  | 18.3      | 5  | 6  | 0.0009      | -                          | Loss         | -   | -      | -      |
| CIS13:72336914 | 13  | 44.3      | 5  | 6  | 0.0042      | n/a                        | n/a          | n/a | n/a    | n/a    |
| <i>Pten*</i>   | 19  | 50.2      | 4  | 5  | 0.0046      | -                          | Loss         | S/G | Y      | Both   |
| <i>Itgb1</i>   | 14  | 43.4      | 5  | 5  | 0.0062      | <i>Fgf14</i>               | ?            | -   | -      | -      |
| <i>Nfib</i>    | 4   | 24.7      | 7  | 9  | 0.0071      | -                          | Gain         | S   | -      | Ptch   |
| <i>Myt1l</i>   | 12  | 67.2      | 8  | 10 | 0.0089      | <i>Pxdn, Tpo, Sntg2</i>    | Loss         | -   | -      | -      |
| <i>Ankrd5</i>  | 2   | 1071.3    | 8  | 15 | 0.0092      | <i>Plcb4, Pak7, Snap25</i> | ?            | -   | -      | -      |
| <i>Slit3</i>   | 11  | 494.3     | 8  | 12 | 0.012       | -                          | Loss         | -   | -      | -      |
| <i>Tmem45b</i> | 9   | 58.4      | 4  | 5  | 0.019       | -                          | ?            | -   | -      | -      |
| <i>Sfi1</i>    | 11  | 51        | 5  | 6  | 0.021       | -                          | Loss         | -   | -      | Both   |
| CIS15:70979306 | 15  | 20.3      | 4  | 4  | 0.028       | n/a                        | n/a          | n/a | n/a    | n/a    |
| <i>Fgf13</i>   | X   | 23.5      | 3  | 4  | 0.026       | -                          | Gain         | -   | -      | -      |
| CIS3:147532546 | 3   | 140.5     | 4  | 7  | 0.043       | n/a                        | n/a          | n/a | n/a    | n/a    |
| <i>L3mbtl4</i> | 17  | 221.6     | 7  | 7  | 0.043       | <i>Tmem200c</i>            | Loss         | -   | -      | -      |
| <i>Adcy5</i>   | 16  | 127.1     | 4  | 6  | 0.044       | <i>Ptblb</i>               | Loss         | -   | -      | -      |

**B. Cerebellum Controls**

|                    |   |      |   |    |       |               |     |  |  |  |
|--------------------|---|------|---|----|-------|---------------|-----|--|--|--|
| <i>Faf1</i>        | 4 | 41.7 | 4 | 4  | 0.01  | -             | ?   |  |  |  |
| <i>I7Rn6</i>       | 7 | 10   | 3 | 3  | 0.018 | <i>Ccdc81</i> | ?   |  |  |  |
| CIS6:31346217_240k | 6 | 844  | 6 | 8  | 0.045 | n/a           | n/a |  |  |  |
| <i>Ric3</i>        | 7 | 99   | 4 | 4  | 0.035 | <i>Tub</i>    | ?   |  |  |  |
| CIS9:68415409_240k | 9 | 1738 | 9 | 11 | 0.016 | n/a           | n/a |  |  |  |
